# Supplementary material for: A comprehensive overview of grain development in Brachypodium distachyon variety Bd21
Source: PubMed Central journal article supplement — J Exp Bot. 2011 Oct 20;63(2):739–55. doi: 10.1093/jxb/err298 (PMC3254678; doi:10.1093/jxb/err298), 2011-10-20

**A comprehensive overview of grain development in *Brachypodium distachyon* variety Bd21**

*Fabienne Guillon, Colette Larre, Fabrice Petitpas, Adeline Berger, Jihad Moussawi, Helene Rogniaux, Anne-Lise Santoni, Luc Saulnier, Frederic Jamme, Martine Miquel, Loïc Lepiniec, and Bertrand Dubreucq*

Supplementary Tables S1-S2

Supplementary Figures S1-S5

**Table S1:** Full list of proteins identified from SDS-PAGE displayed in Fig. 3. All analyses were performed with a Q-TOF instrument

| DAF-N | Bradi_1.0      | MW    | NUP | % Cov | Score | Best homologue protein name                                                              | E-value | GO<br>Biological process                                                       |
|-------|----------------|-------|-----|-------|-------|------------------------------------------------------------------------------------------|---------|--------------------------------------------------------------------------------|
| 5-1   | Bradi1g25440.1 | 55160 | 14  | 45    | 1604  | Beta-amylase [Triticum aestivum]                                                         | 0.0     | Polysaccharide catabolic process                                               |
| 5-2   | Bradi1g09690.1 | 31817 | 4   | 16    | 255   | endotransglucosylase/hydrolase XTH1 [Triticum aestivum]                                  | 8 e-119 | Cellular glucan metabolic process                                              |
|       | Bradi1g25440.2 | 50006 | 4   | 15    | 192   | Beta-amylase[Triticum aestivum]                                                          | 0.0     | Polysaccharide catabolic process                                               |
|       | Bradi2g17290.1 | 59201 | 2   | 4     | 118   | ATP synthase subunit beta, mitochondrial precursor [Zea mays]                            | 0.0     | ATP synthesis; Hydrogen ion transport; Ion Transport; Transport                |
|       | Bradi2g37480.1 | 23630 | 2   | 11    | 62    | Dehydroascorbate reductase [Triticum aestivum].                                          | 2 e-109 | Oxidation reduction                                                            |
|       | Bradi2g33320.1 | 31962 | 2   | 14    | 177   | Putative acid phosphatase [Hordeum vulgare subsp. vulgare]                               | 9 e-107 | abscisic acid mediated signaling pathway; protein amino acid dephosphorylation |
| 7-1   | Bradi1g25440.1 | 50007 | 2   | 5     | 120   | Beta-amylase [Triticum aestivum]                                                         | 0.0     | polysaccharide catabolic process                                               |
| 9-1   | Bradi1g25440.1 | 50007 | 3   | 8     | 165   | Beta-amylase [Triticum aestivum]                                                         | 0.0     | polysaccharide catabolic process                                               |
| 9-2   | Bradi1g25440.1 | 50007 | 6   | 13    | 1050  | Beta-amylase [Triticum aestivum]                                                         | 0.0     | polysaccharide catabolic process                                               |
| 9-3   | Bradi1g25440.1 | 50007 | 5   | 13    | 342   | Beta-amylase [Triticum aestivum]                                                         | 0.0     | polysaccharide catabolic process                                               |
|       | Bradi1g68080.3 | 48964 | 2   | 6     | 95    | Enolase [Zea mays]                                                                       | 0.0     |                                                                                |
| 9-4   | Bradi1g09690.1 | 31817 | 2   | 10    | 153   | Endotransglucosylase/hydrolase XTH1 [Triticum aestivum]                                  | 8e-119  | cellular glucan metabolic process                                              |
| 13-1  | Bradi1g09690.1 | 31817 | 2   | 7     | 60    | Endotransglucosylase/hydrolase XTH1 [Triticum aestivum]                                  | 8 e-119 | Cellular glucan metabolic process                                              |
| 15-1  | Bradi2g38060.1 | 55113 | 15  | 34    | 717   | 11S globulin [Avena sativa]                                                              | 0.0     | Nutrient reservoir activity                                                    |
|       | Bradi1g25440.1 | 55160 | 15  | 41    | 951   | Beta-amylase[Triticum aestivum]                                                          | 0.0     | polysaccharide catabolic process                                               |
|       | Bradi1g05910.1 | 56331 | 7   | 21    | 390   | Globulin 2 [Zea mays]                                                                    | 9 e-99  | Nutrient reservoir activity                                                    |
|       | Bradi2g20990.1 | 51250 | 6   | 13    | 243   | Ribulose-1,5-bisphosphate carboxylase/oxygenase large subunit [Brachypodium distachyon]. | 0.0     | Calvin cycle ; Carbon dioxide fixation ; Photorespiration; Photosynthesis      |
|       | Bradi2g13080.1 | 85082 | 6   | 8     | 283   | Ribulose-1,5-bisphosphate carboxylase/oxygenase large subunit [Brachypodium distachyon]. | 0.0     | Calvin cycle ; Carbon dioxide fixation ; Photorespiration; Photosynthesis      |
|       | Bradi3g27330.1 | 75538 | 6   | 10    | 264   | Ribulose-1,5-bisphosphate carboxylase/oxygenase large subunit [Brachypodium distachyon]. | 0.0     | Calvin cycle ; Carbon dioxide fixation ; Photorespiration; Photosynthesis      |
|       | Bradi1g13040.1 | 64973 | 5   | 10    | 268   | Ribulose-1,5-bisphosphate carboxylase/oxygenase large subunit [Brachypodium distachyon]. | 1 e-107 | Calvin cycle ; Carbon dioxide fixation ; Photorespiration; Photosynthesis      |
|       | Bradi4g37350.1 | 52115 | 5   | 16    | 272   | Ribulose-1,5-bisphosphate carboxylase/oxygenase large subunit [Brachypodium distachyon]. | 0.0     | Calvin cycle ; Carbon dioxide fixation ; Photorespiration; Photosynthesis      |

|             |                |        |    |    |      |                                                                                          |         |                                                                           |
|-------------|----------------|--------|----|----|------|------------------------------------------------------------------------------------------|---------|---------------------------------------------------------------------------|
|             | Bradi4g19460.1 | 51499  | 4  | 11 | 232  | Ribulose biphosphate carboxylase large chain [stellaria media]                           | 0.0     | Nutrient reservoir activity                                               |
|             | Bradi2g17290.1 | 59201  | 3  | 7  | 149  | Globulin 3 [Triticum aestivum].                                                          | 0.0     | metabolic process                                                         |
|             | Bradi4g28220.1 | 54630  | 3  | 9  | 82   | UDP-glucose pyrophosphorylase [Bambusa oldhamii].                                        | 8 e-119 | ATP synthesis; Hydrogen ion transport; Ion Transport; Transport           |
|             | Bradi1g09690.1 | 31817  | 3  | 15 | 141  | Adenosylhomocysteinase [Zea mays]                                                        | 0.0     | Nutrient reservoir activity                                               |
|             | Bradi3g22550.2 | 48319  | 2  | 5  | 52   | ATP synthase subunit beta, mitochondrial precursor [Zea mays].                           | 3 e-174 | Cellular glucan metabolic process                                         |
|             | Bradi1g02940.3 | 50072  | 1  | 4  | 112  | Seed storage globulin. [Avena sativa]                                                    |         | Glycolysis                                                                |
|             |                |        |    |    |      | Endotransglucosylase/hydrolase XTH1 [Triticum aestivum]                                  |         | Protein folding                                                           |
|             |                |        |    |    |      | Enolase [Oryza sativa (japonica cultivar-group)].                                        |         |                                                                           |
|             |                |        |    |    |      | Calreticulin2 [Zea mays].                                                                |         |                                                                           |
| <b>15-2</b> | Bradi2g38060.1 | 55113  | 18 | 49 | 1760 | 11S globulin [Avena sativa]                                                              | 0.0     | Nutrient reservoir activity                                               |
|             | Bradi2g40840.1 | 55679  | 10 | 23 | 978  | 11S globulin [Avena sativa]                                                              | 0.0     | Nutrient reservoir activity                                               |
|             | Bradi4g28220.1 | 54630  | 8  | 20 | 348  | Seed storage globulin [Avena sativa ]                                                    | 0.0     | Nutrient reservoir activity                                               |
|             | Bradi4g29130.1 | 37213  | 6  | 16 | 273  | GluB-5 short variant [Oryza sativa Japonica Group]                                       | 7 e-91  | Nutrient reservoir activity                                               |
|             | Bradi2g13080.1 | 85082  | 6  | 6  | 245  | Ribulose-1,5-bisphosphate carboxylase/oxygenase large subunit [Brachypodium distachyon]. | 1 e-107 | Calvin cycle ; Carbon dioxide fixation ; Photorespiration; Photosynthesis |
|             | Bradi1g13040.1 | 64973  | 4  | 11 | 208  | Ribulose-1,5-bisphosphate carboxylase/oxygenase large subunit [Brachypodium distachyon]. | 4 e-173 | Nutrient reservoir activity                                               |
|             | Bradi3g27270.1 | 46097  | 3  | 10 | 160  | Globulin 3 [Triticum aestivum].                                                          | 0.0     | Calvin cycle ; Carbon dioxide fixation ; Photorespiration; Photosynthesis |
|             | Bradi2g20990.1 | 51250  | 3  | 8  | 167  | Ribulose-1,5-bisphosphate carboxylase/oxygenase large subunit [Brachypodium distachyon]. | 8 e-119 | Calvin cycle ; Carbon dioxide fixation ; Photorespiration; Photosynthesis |
|             | Bradi1g25440.2 | 50007  | 3  | 9  | 135  | Ribulose-1,5-bisphosphate carboxylase/oxygenase large subunit [Brachypodium distachyon]. | 9 e-99  | Calvin cycle ; Carbon dioxide fixation ; Photorespiration; Photosynthesis |
|             | Bradi1g09690.1 | 31817  | 3  | 14 | 148  | Ribulose-1,5-bisphosphate carboxylase/oxygenase large subunit [Brachypodium distachyon]. | 0.0     | polysaccharide catabolic process                                          |
|             | Bradi1g05910.1 | 56332  | 2  | 7  | 95   | Beta-amylase [Triticum aestivum]                                                         |         | Cellular glucan metabolic process                                         |
|             | Bradi1g60320.3 | 92990  | 2  | 2  |      | Endotransglucosylase/hydrolase XTH1 [Triticum aestivum]                                  |         | Nutrient reservoir activity                                               |
|             |                |        |    |    |      | Globulin-like protein [Oryza sativa Japonica Group].                                     |         | biosynthetic process; sucrose metabolic process                           |
|             |                |        |    |    |      | Sucrose synthase [Bambusa oldhamii]                                                      |         |                                                                           |
| <b>15-3</b> | Bradi2g38060.1 | 55113  | 9  | 29 | 674  | 11S globulin [Avena sativa]                                                              | 0.0     | Nutrient reservoir activity                                               |
|             | Bradi1g13040.1 | 64973  | 9  | 22 | 515  | Globulin 3 [Triticum aestivum]                                                           | 1 e-107 | Nutrient reservoir activity                                               |
|             | Bradi2g02140.1 | 39 841 | 7  | 31 | 352  | Xylanase inhibitor 725OS [Triticum aestivum]                                             | 3 e-44  | Xylan degradation                                                         |
|             | Bradi3g05220.1 | 42206  | 7  | 29 | 486  |                                                                                          | 0.0     | Glycolysis                                                                |

|             |                |       |    |    |      |                                                                                                             |         |                                                                                                                                    |
|-------------|----------------|-------|----|----|------|-------------------------------------------------------------------------------------------------------------|---------|------------------------------------------------------------------------------------------------------------------------------------|
|             | Bradi3g14040.1 | 36623 | 5  | 29 | 545  | Phosphoglycerate kinase, cytosolic.                                                                         | 4 e-179 | Glycolysis                                                                                                                         |
|             | Bradi2g50500.1 | 50459 | 3  | 8  | 173  | Glyceraldehyde-3-phosphate dehydrogenase [Hordeum vulgare]<br><br>Aspartate aminotransferase [Oryza sativa] | 0.0     | 2-oxoglutarate metabolic process<br><br>Aspartate metabolic process<br><br>Biosynthetic process<br><br>Glutamate metabolic process |
| <b>15-4</b> | Bradi1g09690.1 | 31817 | 11 | 45 | 1692 | Endotransglucosylase/hydrolase XTH1 [Triticum aestivum]                                                     | 8 e-119 | Cellular glucan metabolic process                                                                                                  |
|             | Bradi2g38060.1 | 55113 | 7  | 20 | 493  | 11S globulin [Avena sativa]                                                                                 | 0.0     | Nutrient reservoir activity                                                                                                        |
|             | Bradi2g09600.1 | 37736 | 2  | 6  | 83   | Peroxidase 1 [Triticum aestivum].                                                                           | 3 e-138 | Hydrogen peroxide catabolic process ; oxidation reduction                                                                          |
|             | Bradi2g39940.1 | 21332 | 2  | 10 | 53   | Prolamine [Brachypodium distachyon].                                                                        | 1e-15   | Nutrient reservoir activity                                                                                                        |
| <b>15-5</b> | Bradi2g38060.1 | 55113 | 12 | 32 | 1486 | 11S globulin [Avena sativa]                                                                                 | 0.0     | Nutrient reservoir activity                                                                                                        |
|             | Bradi1g09690.1 | 31817 | 5  | 24 | 452  | Endotransglucosylase/hydrolase XTH1 [Triticum aestivum]                                                     | 8 e-119 | Cellular glucan metabolic process                                                                                                  |
|             | Bradi2g40840.1 | 55679 | 5  | 12 | 288  | 12s globulin [Avena sativa].                                                                                | 0.0     | Nutrient reservoir activity                                                                                                        |
|             | Bradi4g29130.1 | 37213 | 4  | 12 | 282  | GluB-5 short variant [Oryza sativa Japonica Group].                                                         | 7 e-91  | Nutrient reservoir activity                                                                                                        |
|             | Bradi4g28220.1 | 54630 | 2  | 6  | 137  | Seed storage globulin [Avena sativa]                                                                        | 0.0     | Nutrient reservoir activity                                                                                                        |
| <b>15-6</b> | Bradi2g38060.1 | 55113 | 1  | 4  | 180  | 11S globulin [Avena sativa]                                                                                 | 0.0     | Nutrient reservoir activity                                                                                                        |
| <b>19-1</b> | Bradi1g13040   | 64973 | 11 | 23 | 3396 | Globulin 3 [Triticum aestivum]                                                                              | 1e-107  | Nutrient reservoir activity                                                                                                        |
|             | Bradi2g38060.1 | 55113 | 7  | 26 | 759  | 11S globulin [Avena sativa]                                                                                 | 0.0     | Nutrient reservoir activity                                                                                                        |
|             | Bradi1g05910.1 | 56332 | 3  | 8  | 174  | Globulin-2 [Zea mays]                                                                                       | 5e-97   | Nutrient reservoir activity                                                                                                        |
|             | Bradi4g29130.1 | 37213 | 3  | 12 | 280  | GluB-5 short variant [Oryza sativa Japonica Group].                                                         | 7e-91   | Nutrient reservoir activity                                                                                                        |
| <b>19-2</b> | Bradi2g38060.1 | 55113 | 11 | 33 | 1056 | 11S globulin [Avena sativa]                                                                                 | 0.0     | Nutrient reservoir activity                                                                                                        |
|             | Bradi1g05910.1 | 56332 | 8  | 25 | 864  | Globulin-2 [Zea mays] Globulin 3 [Triticum aestivum]                                                        | 5e-97   | Nutrient reservoir activity                                                                                                        |
|             | Bradi1g13040.1 | 64973 | 7  | 17 | 17   | Seed storage globulin [Avena sativa ]                                                                       | 1e-107  | Nutrient reservoir activity                                                                                                        |
|             | Bradi4g28220.1 | 54630 | 5  | 22 | 364  | Xylanase inhibitor 725OS [Triticum aestivum]                                                                | 2e-175  | Nutrient reservoir activity                                                                                                        |
|             | Bradi2g02140.1 | 40214 | 4  | 17 | 355  | GluB-5 short variant [Oryza sativa Japonica Group].                                                         | 3e-44   | Xylan degradation                                                                                                                  |
|             | Bradi4g29130.1 | 37213 | 3  | 12 | 379  |                                                                                                             | 7e-91   | Nutrient reservoir activity                                                                                                        |
| <b>19-3</b> | Bradi2g38060.1 | 55113 | 11 | 32 | 3305 | 11S globulin [Avena sativa]                                                                                 | 0.0     | Nutrient reservoir activity                                                                                                        |
|             | Bradi4g29130.1 | 37213 | 3  | 12 | 1041 | GluB-5 short variant [Oryza sativa Japonica Group].                                                         | 7e-91   | Nutrient reservoir activity                                                                                                        |
|             | Bradi1g13040   | 64973 | 2  | 6  | 208  | Globulin 3 [Triticum aestivum]                                                                              | 1e-107  | Nutrient reservoir activity                                                                                                        |
|             | Bradi4g28220.1 | 54630 | 2  | 5  | 155  |                                                                                                             | 2e-175  | Nutrient reservoir activity                                                                                                        |

|      |                |       |    |    |      |                                                         |        |                                                               |
|------|----------------|-------|----|----|------|---------------------------------------------------------|--------|---------------------------------------------------------------|
|      |                |       |    |    |      | Seed storage globulin [Avena sativa ]                   |        |                                                               |
| 19-4 | Bradi2g38060.1 | 55113 | 9  | 25 | 4735 | 11S globulin [Avena sativa]                             | 0.0    | Nutrient reservoir activity                                   |
|      | Bradi4g29130.1 | 37213 | 3  | 10 | 1279 | GluB-5 short variant [Oryza sativa Japonica Group].     | 7e-91  | Nutrient reservoir activity                                   |
|      | Bradi1g50200.1 | 18870 | 3  | 25 | 171  | Avenin-like b [Triticum aestivum].                      | 1e-17  | Nutrient reservoir activity                                   |
|      | Bradi4g28220.1 | 54630 | 3  | 7  | 92   | Seed storage globulin [Avena sativa ]                   | 2e-175 | Nutrient reservoir activity                                   |
| 19-5 | Bradi2g38060.1 | 55113 | 8  | 24 | 2644 | 11S globulin [Avena sativa]                             | 0.0    | Nutrient reservoir activity                                   |
|      | Bradi2g39940.1 | 21322 | 3  | 16 | 371  | Prolamine [Brachypodium distachyon]                     | 1e-15  | Nutrient reservoir activity                                   |
|      | Bradi4g29130.1 | 37213 | 2  | 3  | 264  | GluB-5 short variant [Oryza sativa Japonica Group].     | 1e-107 | Nutrient reservoir activity                                   |
|      | Bradi1g13040.1 | 64973 | 3  | 8  | 654  | Globulin 3 [Triticum aestivum]                          | 0.0    | Nutrient reservoir activity                                   |
|      | Bradi4g28220.1 | 54630 | 2  | 5  |      | Seed storage globulin [Avena sativa ]                   | 2e-175 | Nutrient reservoir activity                                   |
| 23-1 | Bradi2g38060.1 | 55113 | 10 | 29 | 680  | 11S globulin [Avena sativa]                             | 0.0    | Nutrient reservoir activity                                   |
|      | Bradi2g02140.1 | 40214 | 8  | 29 | 2530 | Xylanase inhibitor 725OS [Triticum aestivum]            | 3e-44  | Xylan degradation                                             |
|      | Bradi1g13040   | 64973 | 9  | 20 | 1726 | Globulin 3 [Triticum aestivum]                          | 1e-107 | Nutrient reservoir activity                                   |
|      | Bradi4g29130.1 | 37213 | 2  | 8  | 169  | GluB-5 short variant [Oryza sativa Japonica Group].     | 7e-91  | Nutrient reservoir activity                                   |
| 23-2 | Bradi2g38060.1 | 55113 | 11 | 27 | 4009 | 11S globulin [Avena sativa]                             | 0.0    | Nutrient reservoir activity                                   |
|      | Bradi2g40840.1 | 55679 | 4  | 10 | 1349 | 11S globulin [Avena sativa]                             | 0.0    | Nutrient reservoir activity                                   |
|      | Bradi2g02140.1 | 40214 | 3  | 13 | 194  | Xylanase inhibitor 725OS [Triticum aestivum]            | 3e-44  | Xylan degradation                                             |
|      | Bradi4g29130.1 | 37212 | 3  | 10 | 956  | GluB-5 short variant [Oryza sativa Japonica Group]      | 7e-91  | Nutrient reservoir activity                                   |
|      | Bradi1g13040.1 | 64973 | 2  | 6  | 156  | Globulin 3 [Triticum aestivum]                          | 1e-107 | Nutrient reservoir activity                                   |
| 23-3 | Bradi2g38060.1 | 55113 | 13 | 34 | 1968 | 11S globulin [Avena sativa]                             | 0.0    | Nutrient reservoir activity                                   |
|      | Bradi2g40840.1 | 55679 | 8  | 26 | 954  | 11S globulin [Avena sativa]                             | 0.0    | Nutrient reservoir activity                                   |
|      | Bradi2g02140.1 | 40214 | 3  | 16 | 248  | Xylanase inhibitor 725OS [Triticum aestivum]            | 3e-44  | Xylan degradation                                             |
|      | Bradi4g29130.1 | 37213 | 10 | 10 | 670  | GluB-5 short variant [Oryza sativa Japonica Group]      | 7e-91  | Nutrient reservoir activity                                   |
|      | Bradi1g13040.1 | 64973 | 3  | 8  | 142  | Globulin 3 [Triticum aestivum]                          | 1e-107 | Nutrient reservoir activity                                   |
|      | Bradi4g28220.1 | 54630 | 3  | 9  | 172  | Seed storage globulin [Avena sativa ]                   | 2e-175 | Nutrient reservoir activity                                   |
|      | Bradi1g29880.1 | 27692 | 3  | 18 | 202  | Endochitinase 1 Hordeum vulgare].                       | 2e-132 | Carbohydrate metabolism                                       |
|      | Bradi1g09690.1 | 31817 | 2  | 11 | 270  | Endotransglucosylase/hydrolase XTH1 [Triticum aestivum] | 8e-119 | Chitin degradation; Plant defense; Polysaccharide degradation |
|      |                |       |    |    |      |                                                         |        | Cellular glucan metabolic process                             |

|      |                |       |    |    |      |                                                     |        |                             |
|------|----------------|-------|----|----|------|-----------------------------------------------------|--------|-----------------------------|
| 23-4 | Bradi2g38060.1 | 55113 | 12 | 33 | 1790 | 11S globulin [Avena sativa]                         | 0.0    | Nutrient reservoir activity |
|      | Bradi4g28220.1 | 54630 | 6  | 15 | 962  | Seed storage globulin [Avena sativa ]               | 2e-175 | Nutrient reservoir activity |
|      | Bradi4g29130.1 | 37213 | 4  | 14 | 261  | GluB-5 short variant [Oryza sativa Japonica Group]. | 7e-91  | Nutrient reservoir activity |
|      | Bradi2g02140.1 | 40214 | 3  | 12 | 233  | Xylanase inhibitor 725OS [Triticum aestivum]        | 3e-44  | Xylan degradation           |
| 23-5 | Bradi2g38060.1 | 55113 | 9  | 22 | 797  | 11S globulin [Avena sativa]                         | 0.0    | Nutrient reservoir activity |
|      | Bradi1g13040.1 | 64973 | 6  | 17 | 205  | Globulin 3 [Triticum aestivum]                      | 1e-107 | Nutrient reservoir activity |
|      | Bradi4g28220.1 | 54630 | 4  | 11 | 286  | Seed storage globulin [Avena sativa ]               | 2e-175 | Nutrient reservoir activity |
|      | Bradi2g02140.1 | 40214 | 2  | 9  | 120  | Xylanase inhibitor 725OS [Triticum aestivum]        | 3e-44  | Xylan degradation           |
| 23-6 | Bradi2g38060.1 | 55113 | 7  | 18 | 3608 | 11S globulin [Avena sativa]                         | 0.0    | Nutrient reservoir activity |
|      | Bradi4g29130.1 | 37213 | 3  | 10 | 1704 | GluB-5 short variant [Oryza sativa Japonica Group]. | 7e-91  | Nutrient reservoir activity |
|      | Bradi4g28220.1 | 54630 | 4  | 13 | 903  | Seed storage globulin [Avena sativa ]               | 2e-175 | Nutrient reservoir activity |
|      | Bradi2g39940.1 | 21322 | 1  | 5  | 45   | Prolamine [Brachypodium distachyon]                 | 1e-15  | Nutrient reservoir activity |

**Table S2:** Fatty acid composition and content of *B. distachyon* grain.

**Top** Fatty acid composition and content of *B. distachyon* grain. Lipids from manually dehulled grains were derivatised using 2% H<sub>2</sub>SO<sub>4</sub> in methanol, and the fatty acid methyl esters were analysed by gas chromatography – mass spectrography, as described under "Materials and Methods". Data are mol% ± S.E. (n=4).

**Bottom** Fatty acid composition of total lipids from various cereals.

References: 1: E. Ucciani TEC&DOC, Lavoisier , ISBN 2-7430-0009-0

2 : Dubois et al (2008) OCL vol 15 N°1

3 : Banas, A.,et al. (2007).J Exp Bot 58, 2463-2470.

**A**

| Grain Weight (mg) | C12:0        | C14:0         | C14:1         | C16:0          | C16:1         | C18:0         | C18:1 (mol%)   | C18:2          | C18:3         | C20:0         | C20:1         | C22:0         | C24:0         | C26:0         | Total fatty acids |                |                  |
|-------------------|--------------|---------------|---------------|----------------|---------------|---------------|----------------|----------------|---------------|---------------|---------------|---------------|---------------|---------------|-------------------|----------------|------------------|
|                   |              |               |               |                |               |               |                |                |               |               |               |               |               |               | µg/grain          | µg/mgDW        | nmol/grain       |
| 4.93<br>± 0.23    | 2.13<br>±0.7 | 2.78<br>±0.12 | 0.18<br>±0.01 | 15.92<br>±0.12 | 0.32<br>±0.01 | 0.65<br>±0.02 | 35.71<br>±0.49 | 36.97<br>±0.32 | 3.86<br>±0.04 | 0.16<br>±0.01 | 0.61<br>±0.01 | 0.26<br>±0.01 | 0.24<br>±0.01 | 0.21<br>±0.01 | 80.89<br>±3.84    | 16.42<br>±0.13 | 280.53<br>±13.29 |

**B**

|                                 | C12:0 | C14:0 | C16:0 | C18:0     | C18:1       | C18:2       | C18:3     | C20:0   | C20:1   | C22:0 | % oil/grain | Ref. |
|---------------------------------|-------|-------|-------|-----------|-------------|-------------|-----------|---------|---------|-------|-------------|------|
| <i>Avena fatua</i>              |       | 0.6   | 23.4  | 3.3       | 40.9        | 29.5        | 0.9       | 0.8     |         |       | 1.4         | 1    |
| <i>Avena sativa</i>             |       |       | 18.0  | 1.7       | 39.8        | 37.7        | 1.3       |         |         |       |             | 3    |
| <i>Oryza sativa</i>             |       | 0.4   |       | 1.9 - 2.6 | 31.9 - 37.9 | 31.9 - 43.6 | 1.0 - 3.0 | 0 - 0.6 |         |       | 16.0        | 1    |
| <i>Triticum sativum</i>         |       | 10.5  | 16.5  |           | 27.5        | 41.9        | 2.4       |         |         |       | 10.7        | 1    |
| <i>Zea mais</i>                 |       |       |       | 2.3 - 2.7 | 28.4 - 36.9 | 45.9 - 55.5 | 0 - 0.9   | 0 - 0.5 | 0 - 0.3 |       | 17 - 37.8   | 1    |
| <i>Triticum aestivum (germ)</i> |       |       | 17.5  | 1,0       | 19.1        | 55.2        | 6.1       | 0.2     | 1.6     |       |             | 2    |

(1) E. Ucciani, TEC&DOC, Lavoisier, Paris, ISBN 2-7430-0009-0

(2) Dubois et al., OCL, vol 15 N°A, 2008

(3) Banas et al., J. Exp. Bot., 58, pp. 2463-2470, 2007



## Supplementary Figures

**Figure S1:** Multiplanar reconstructions of the embryo

**A-** Sections at 2 (a), 11 (b), 13 (c) and 16 (d) DAF respectively. e-f: 3D reconstruction of embryo at 11 and 14 DAF respectively. g-h : highlights epidermis differentiation (green), coleorhiza (orange) and root (blue).

**B-** Three dimensional multiplanar reconstruction (3D MPR) of a 30 DAF embryo within the seed coat. a frontal, b transversal, c sagittal.

**Figure S2:** The *Brachypodium* embryo at 28 DAF. Longitudinal section.

c: coleorhiza, rc: root cap, r: radicle, am: apical meristem, co: coleoptile, c: cotyledon, fl: leaf primordium , s: scutellum

**Figure S3:** Bright field micrograph of cross-sections from a *B. distachyon* grain at 22 DAF

Ac : aleurone cell, ne : nucellus epidermis, sc : seed coat, se : storage endosperm, va : vascular tissue

**Figure S4:** Synchrotron UV microspectroscopy (wavelength excitation 275 nm)

**A-** *B. distachyon* grain cross-section at 17 DAF, visible image (a), fluorescence (290-360nm) image (b), merged image obtained by superposition of the visible and fluorescence images (c). Scale bar: 5 microns

**B-** Mature grain cross-sections, visible image (a), fluorescence (290-360nm) image (b), merged image(c). Scale bar: 4 microns

**C-** Fluorescence emission spectrum associated with the pixel +A in the fluorescence image of mature grain cross-sections and spectra of isolated components obtained as Gaussian functions represented with their emission maxima (a) tryrosine, (b) tryptophan (c) esterified ferulic acid.

**Figure S5:** DIC (left panel) and immunofluorescence (right panel) micrographs of grain cross-sections from diverse cereals. Sections were labelled with anti-(1-3)(1-4)- $\beta$ -glucan.

al aleurone layer, ne nucellus epidermis

Are provided as supplementary data laser scanning microscopy files of 7 stages of embryo development. The files contain full Z stacks through the grain for additional 3D reconstructions or additional observations

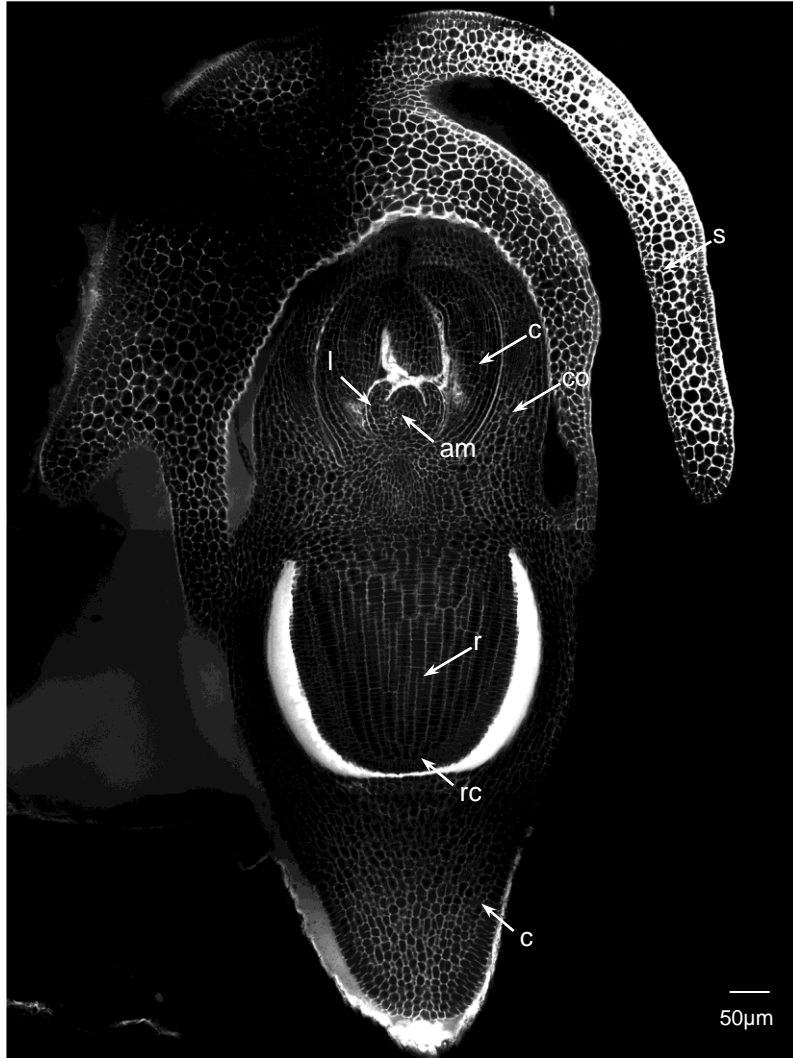

Supplementary figure S1:

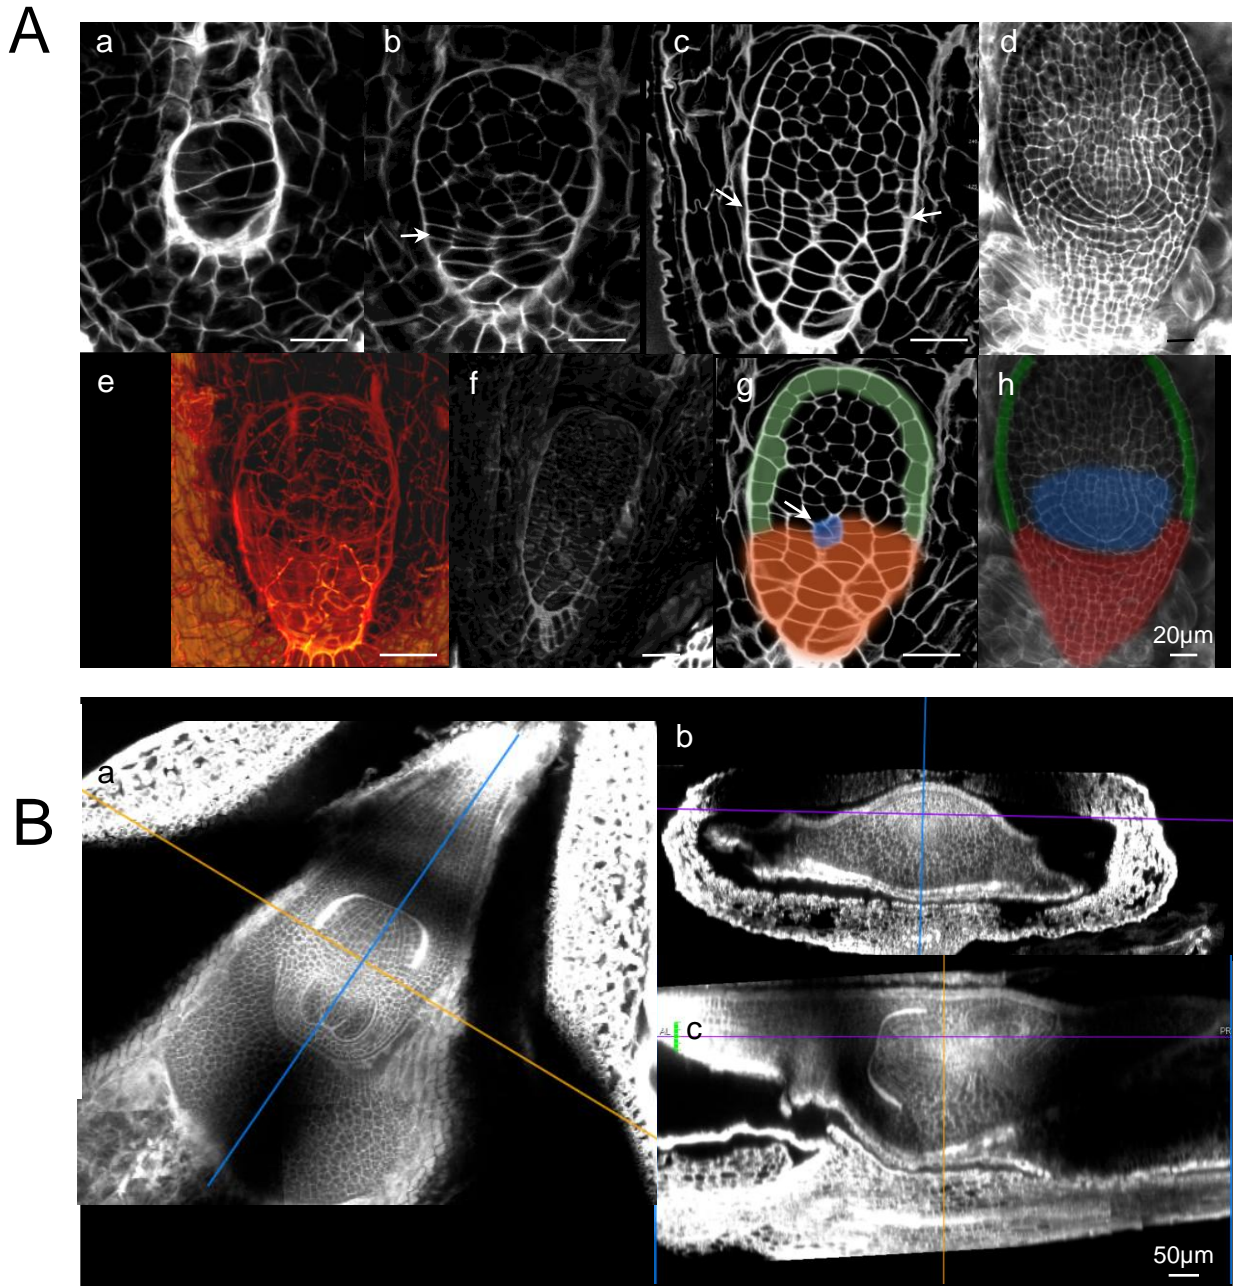

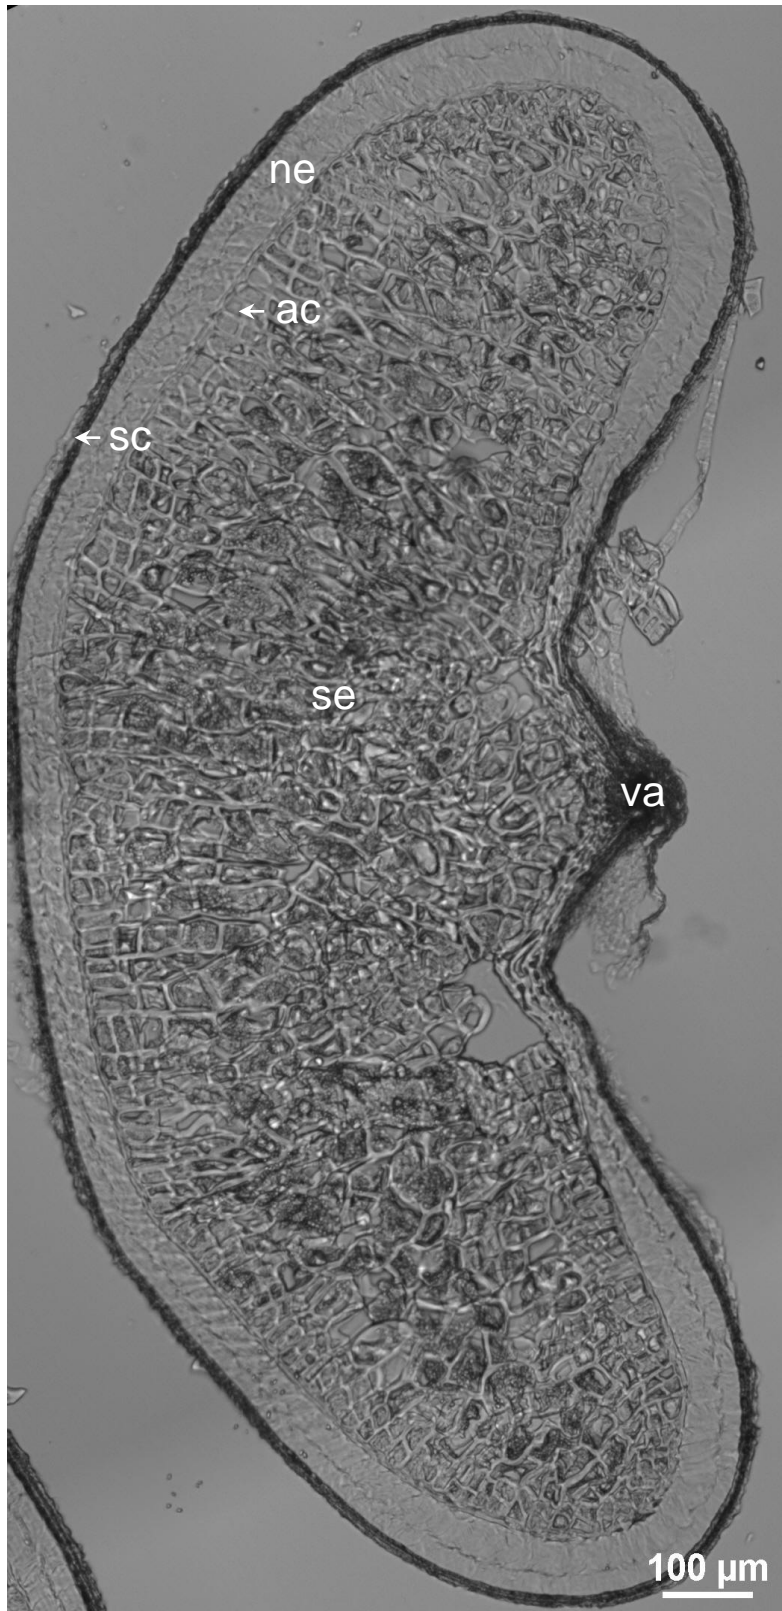

Supplementary figure S3:

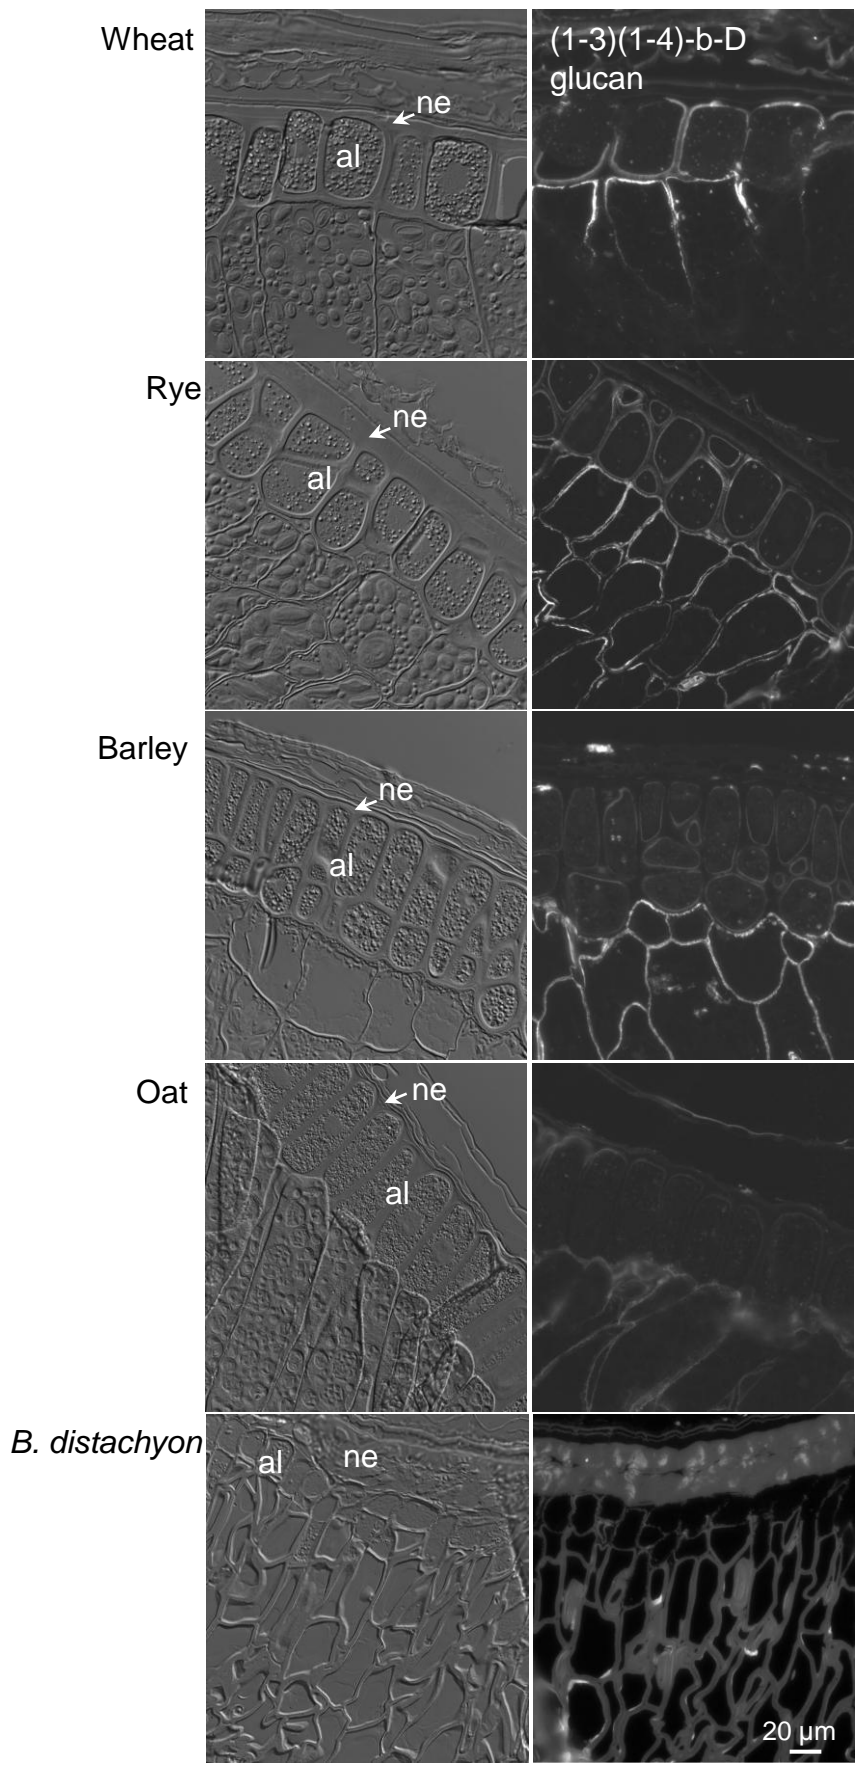

Supplementary figure S4:

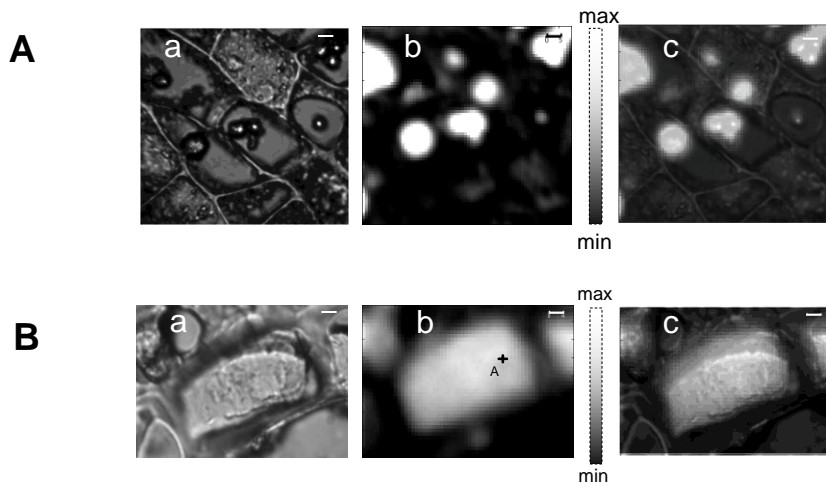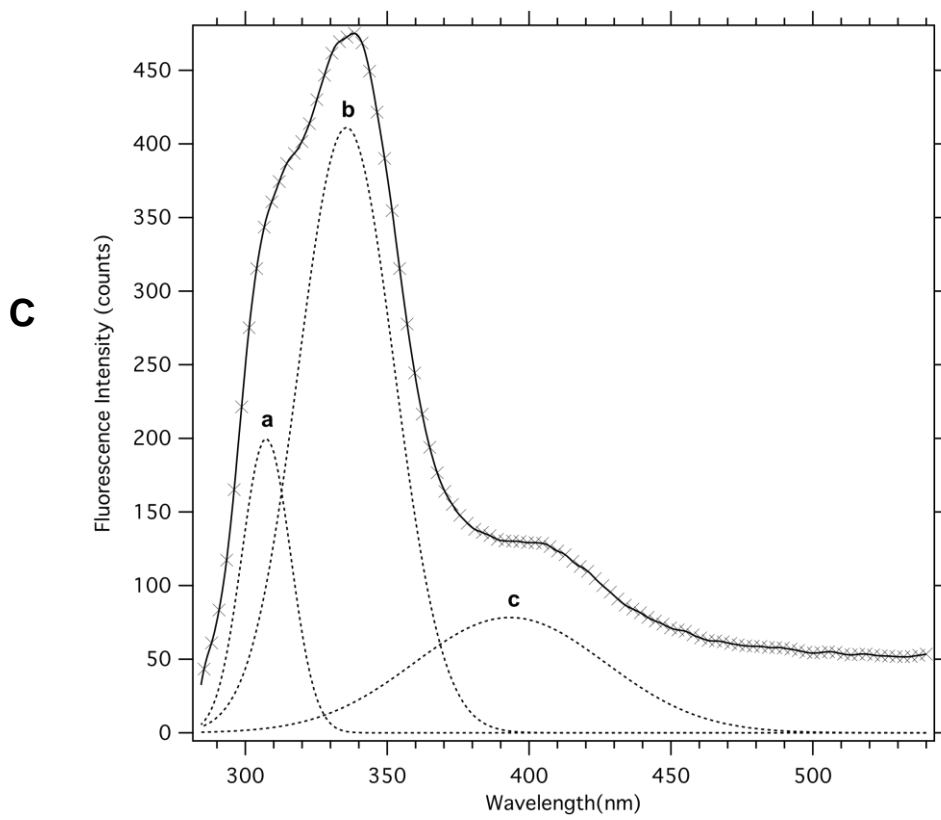

Supplement: supp_err298_00066779_file001.pdf [file supp_err298_00066779_file001.pdf]
